# Supplementary material for: Ancestral resurrection reveals evolutionary mechanisms of kinase plasticity
Source: eLife journal article supplement (doi:10.7554/elife.04126), 2014-10-13
Supplement: supp [file elife-04126-supp-v1.zip]

Figure 2 supplement 3

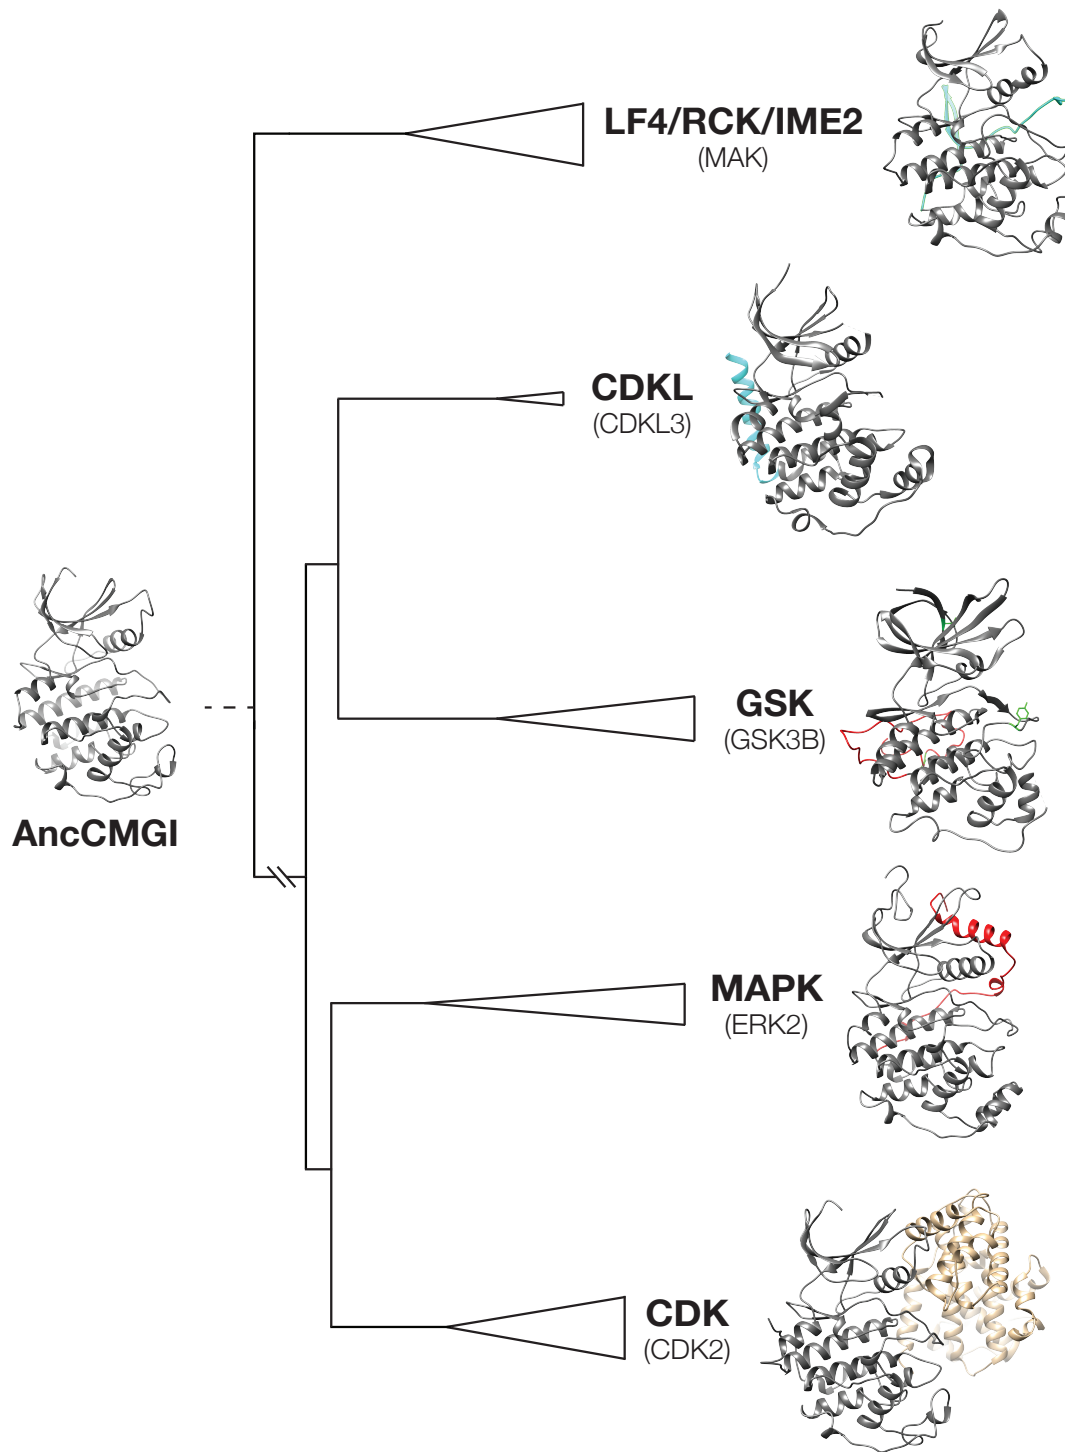

Figure 2 Supplement 3: Structural evolution in the CMGC kinase group

A model of AncCMGI was generated from the CDK2 structure using Phyre2. This structure is compared to the structures of extant CMGC kinases in their phylogenetic context.
