# Supplementary material for: Ancestral resurrection reveals evolutionary mechanisms of kinase plasticity
Source: eLife journal article supplement (doi:10.7554/elife.04126), 2014-10-13
Supplement: supp [file elife-04126-supp-v2.zip]

Archive with 15 entries (15 files):
- elife_poa_e04126_Figure_4_figure_supplement_3.pdf
- elife_poa_e04126_Figure_1_figure_supplement_2.pdf
- elife_poa_e04126_Figure_2_figure_supplement_3.pdf
- elife_poa_e04126_Figure_5_figure_supplement_2.pdf
- elife_poa_e04126_Figure_2_figure_supplement_2.pdf
- elife_poa_e04126_Figure_1_figure_supplement_1.pdf
- elife_poa_e04126_Figure_5_figure_supplement_1.pdf
- elife_poa_e04126_Figure_4_figure_supplement_2.pdf
- elife_poa_e04126_Supplemental_File_2_Yeast_Strains.xlsx
- elife_poa_e04126_Figure_3_figure_supplement_2.pdf
- elife_poa_e04126_Supplemental_File_1_Plasmids.xlsx
- elife_poa_e04126_Figure_3_figure_supplement_1.pdf
- elife_poa_e04126_Figure_2_figure_supplement_1.pdf
- elife_poa_e04126_Figure_4_figure_supplement_1.pdf
- elife_poa_e04126_Figure_4_figure_supplement_4.pdf
