# Supplementary material for: Ancestral resurrection reveals evolutionary mechanisms of kinase plasticity
Source: eLife journal article supplement (doi:10.7554/elife.04126), 2014-10-13
Supplement: supp [file elife-04126-supp-v2.zip › elife_poa_e04126_Supplemental_File_1_Plasmids.xlsx]

## Sheet: Plasmids
				Plasmids used in this study
	plasmid		gene	allele	promoter	tag	vector
	648		S.cer ime2(1-404)	DFGx	pGAL1	TAP	pRSAB1234 (2μ)
	408		N.gru LF4	WT	pGAL1	TAP	pRS314 (CEN/ARS)
	761		N.gru LF4	DFGx	pGAL1	TAP	pRSAB1234 (2μ)
	757		nMOK	DFGx	pGAL1	TAP	pRSAB1234 (2μ)
	419		nICK	WT	pGAL1	TAP	pRSAB1234 (2μ)
	687		nICK	DFGx	pGAL1	TAP	pRSAB1234 (2μ)
	695		AncYlip	ML	pGAL1	TAP	pRSAB1234 (2μ)
	861		AncYlip	B1	pGAL1	TAP	pRSAB1234 (2μ)
	694		AncNcra	ML	pGAL1	TAP	pRSAB1234 (2μ)
	860		AncNcra	B1	pGAL1	TAP	pRSAB1234 (2μ)
	693		AncIME2	ML	pGAL1	TAP	pRSAB1234 (2μ)
	859		AncIME2	B1	pGAL1	TAP	pRSAB1234 (2μ)
	767		AncICK	ML-DFGx	pGAL1	TAP	pRSAB1234 (2μ)
	692		AncICK	ML	pGAL1	TAP	pRSAB1234 (2μ)
	858		AncICK	B1	pGAL1	TAP	pRSAB1234 (2μ)
	762		AncLF4	ML	pGAL1	TAP	pRSAB1234 (2μ)
	822		AncLF4	ML-DFGx	pGAL1	TAP	pRSAB1234 (2μ)
	691		AncNgru	ML	pGAL1	TAP	pRSAB1234 (2μ)
	771		AncNgru	ML	T7	6xHIS	2ST
	856		AncNgru	B1	pGAL1	TAP	pRSAB1234 (2μ)
	857		AncNgru	B2	pGAL1	TAP	pRSAB1234 (2μ)
	743		AncCMGI	ML	pGAL1	TAP	pRSAB1234 (2μ)
	769		AncCMGI	ML	T7	6xHIS	2ST
	894		AncCMGI	ML-DFGx	pGAL1	TAP	pRSAB1234 (2μ)
	744		AncCMGI	B1	pGAL1	TAP	pRSAB1234 (2μ)
	745		AncCMGI	B2	pGAL1	TAP	pRSAB1234 (2μ)
	675		S.cer ime2	K97R	pIME2		pRS303
	733		S.cer ime2	DFGx	pIME2		pRS303
