# Supplementary material for: Ancestral resurrection reveals evolutionary mechanisms of kinase plasticity
Source: eLife journal article supplement (doi:10.7554/elife.04126), 2014-10-13
Supplement: supp [file elife-04126-supp-v2.zip › elife_poa_e04126_Supplemental_File_2_Yeast_Strains.xlsx]

## Sheet: Strains
					S.cerevisiae strains used in this study
	strain		gene	allele(s)		mating type	background	replicating plasmid
	130		S.cer IME2 (1-404)	WT		MATa	W303a*
	2306		S.cer ime2 (1-404)	DFGx		MATa	W303a*	pRSAB1234 (2μ)
	891		N.cra IME2	WT		MATa	W303a*
	895		nMOK	WT		MATa	W303a*
	2549	757	nMOK	DFGx		MATa	W303a*	pRSAB1234 (2μ)
	1796		nICK	WT		MATa	W303a*	pRSAB1234 (2μ)
	2359		nICK	DFGx			W303a*	pRSAB1234 (2μ)
	1761		N.gru LF4	WT		MATa	W303a*	pRS314 (CEN/ARS)
	2550		N.gru LF4	DFGx		MATa	W303a*	pRSAB1234 (2μ)
	2383		AncYlip	ML		MATa	W303a*	pRSAB1234 (2μ)
	2669		AncYlip	B1		MATa	W303a*	pRSAB1234 (2μ)
	2370		AncNcra	ML		MATa	W303a*	pRSAB1234 (2μ)
	2676		AncNcra	B1		MATa	W303a*	pRSAB1234 (2μ)
	2369		AncIME2	ML		MATa	W303a*	pRSAB1234 (2μ)
	2668		AncIME2	B1		MATa	W303a*	pRSAB1234 (2μ)
	2554		AncICK	ML-DFGx		MATa	W303a*	pRSAB1234 (2μ)
	2368		AncICK	ML		MATa	W303a*	pRSAB1234 (2μ)
	2675		AncICK	B1		MATa	W303a*	pRSAB1234 (2μ)
	2551		AncLF4	ML		MATa	W303a*	pRSAB1234 (2μ)
	2566		AncLF4	ML-DFGx		MATa	W303a*	pRSAB1234 (2μ)
	2367		AncNgru	ML		MATa	W303a*	pRSAB1234 (2μ)
	2666		AncNgru	B1		MATa	W303a*	pRSAB1234 (2μ)
	2667		AncNgru	B2		MATa	W303a*	pRSAB1234 (2μ)
	2444		AncCMGI	ML		MATa	W303a*	pRSAB1234 (2μ)
	2820		AncCMGI	ML-DFGx		MATa	W303a*	pRSAB1234 (2μ)
	2445		AncCMGI	B1		MATa	W303a*	pRSAB1234 (2μ)
	2446		AncCMGI	B2		MATa	W303a*	pRSAB1234 (2μ)
	2694		S.cer IME2	WT / WT		MATa/α	SK1**
	2796		S.cer ime2	K97R / WT		MATa/α	SK1**
	2797		S.cer ime2	DFGx / WT		MATa/α	SK1**
	2834		S.cer ime2	DFGx / DFGx		MATa/α	SK1**
	background genotypes:
	*W303a: {leu2-3,112 trp1-1 can1-100 ura3-1 ade2-1 his3-11,15}
	**SK1: {ho::LYS2 / ho::LYS2, ura3- / ura3-, leu2::hisG / leu2::hisG, his3::hisG / his3::hisG, trp1::hisG / trp1::hisG}
