# Supplementary figures and images for: Ancestral resurrection reveals evolutionary mechanisms of kinase plasticity
Source: eLife journal article supplement (doi:10.7554/elife.04126), 2014-10-13

Figure 4 supplement 3

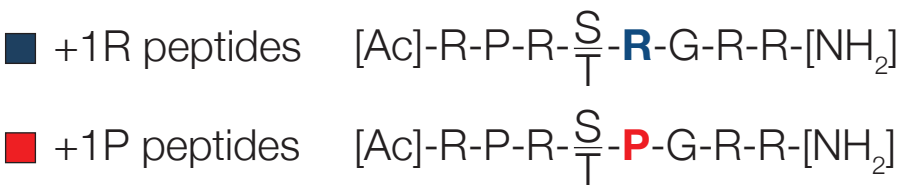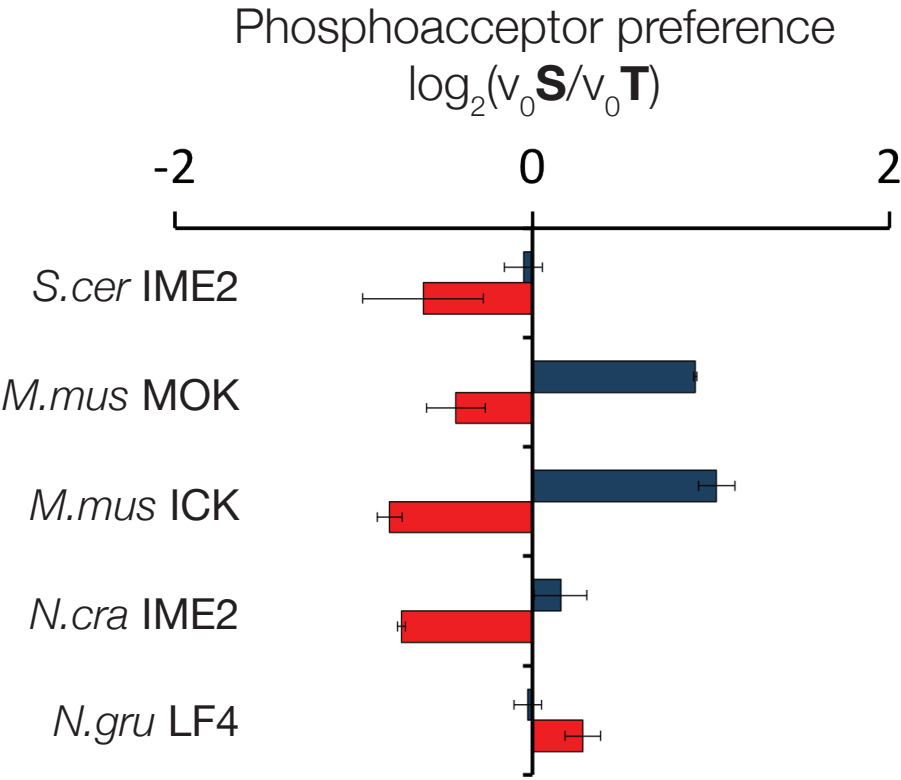

Supplement: supp [file elife-04126-supp-v1.zip]

Figure 3 supplement 2

A

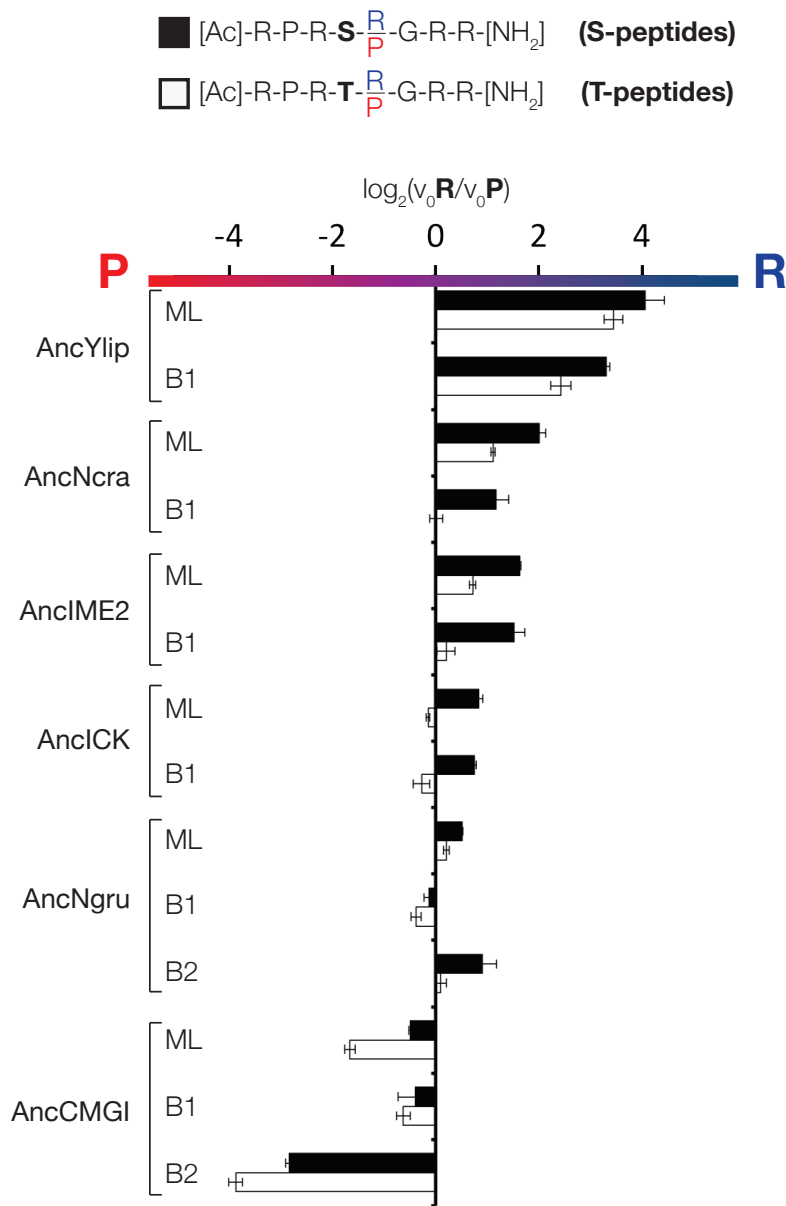

B

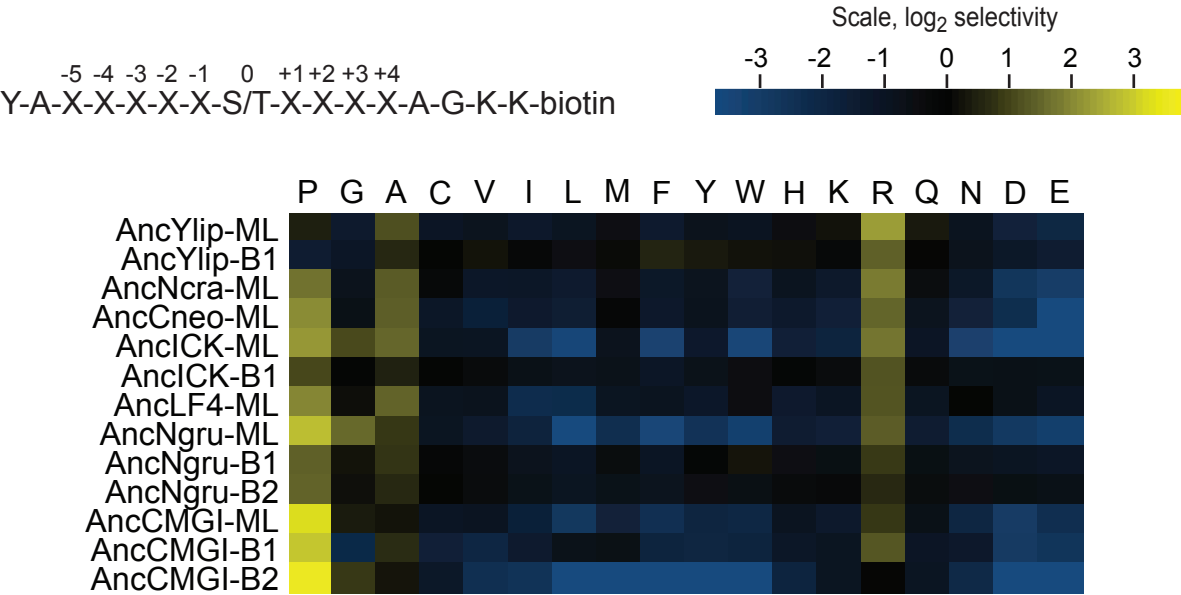

Supplement: supp [file elife-04126-supp-v1.zip]

Figure 4 supplement 1

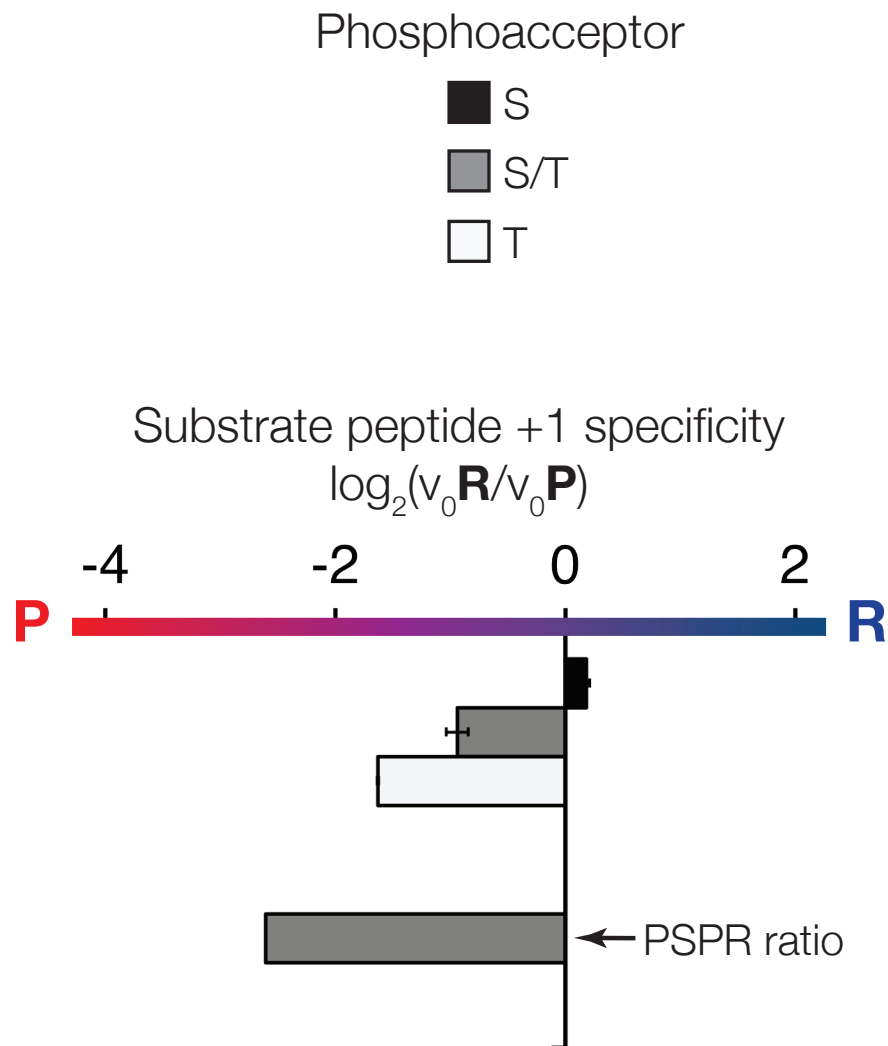

Supplement: supp [file elife-04126-supp-v1.zip]

Figure 1 supplement 2

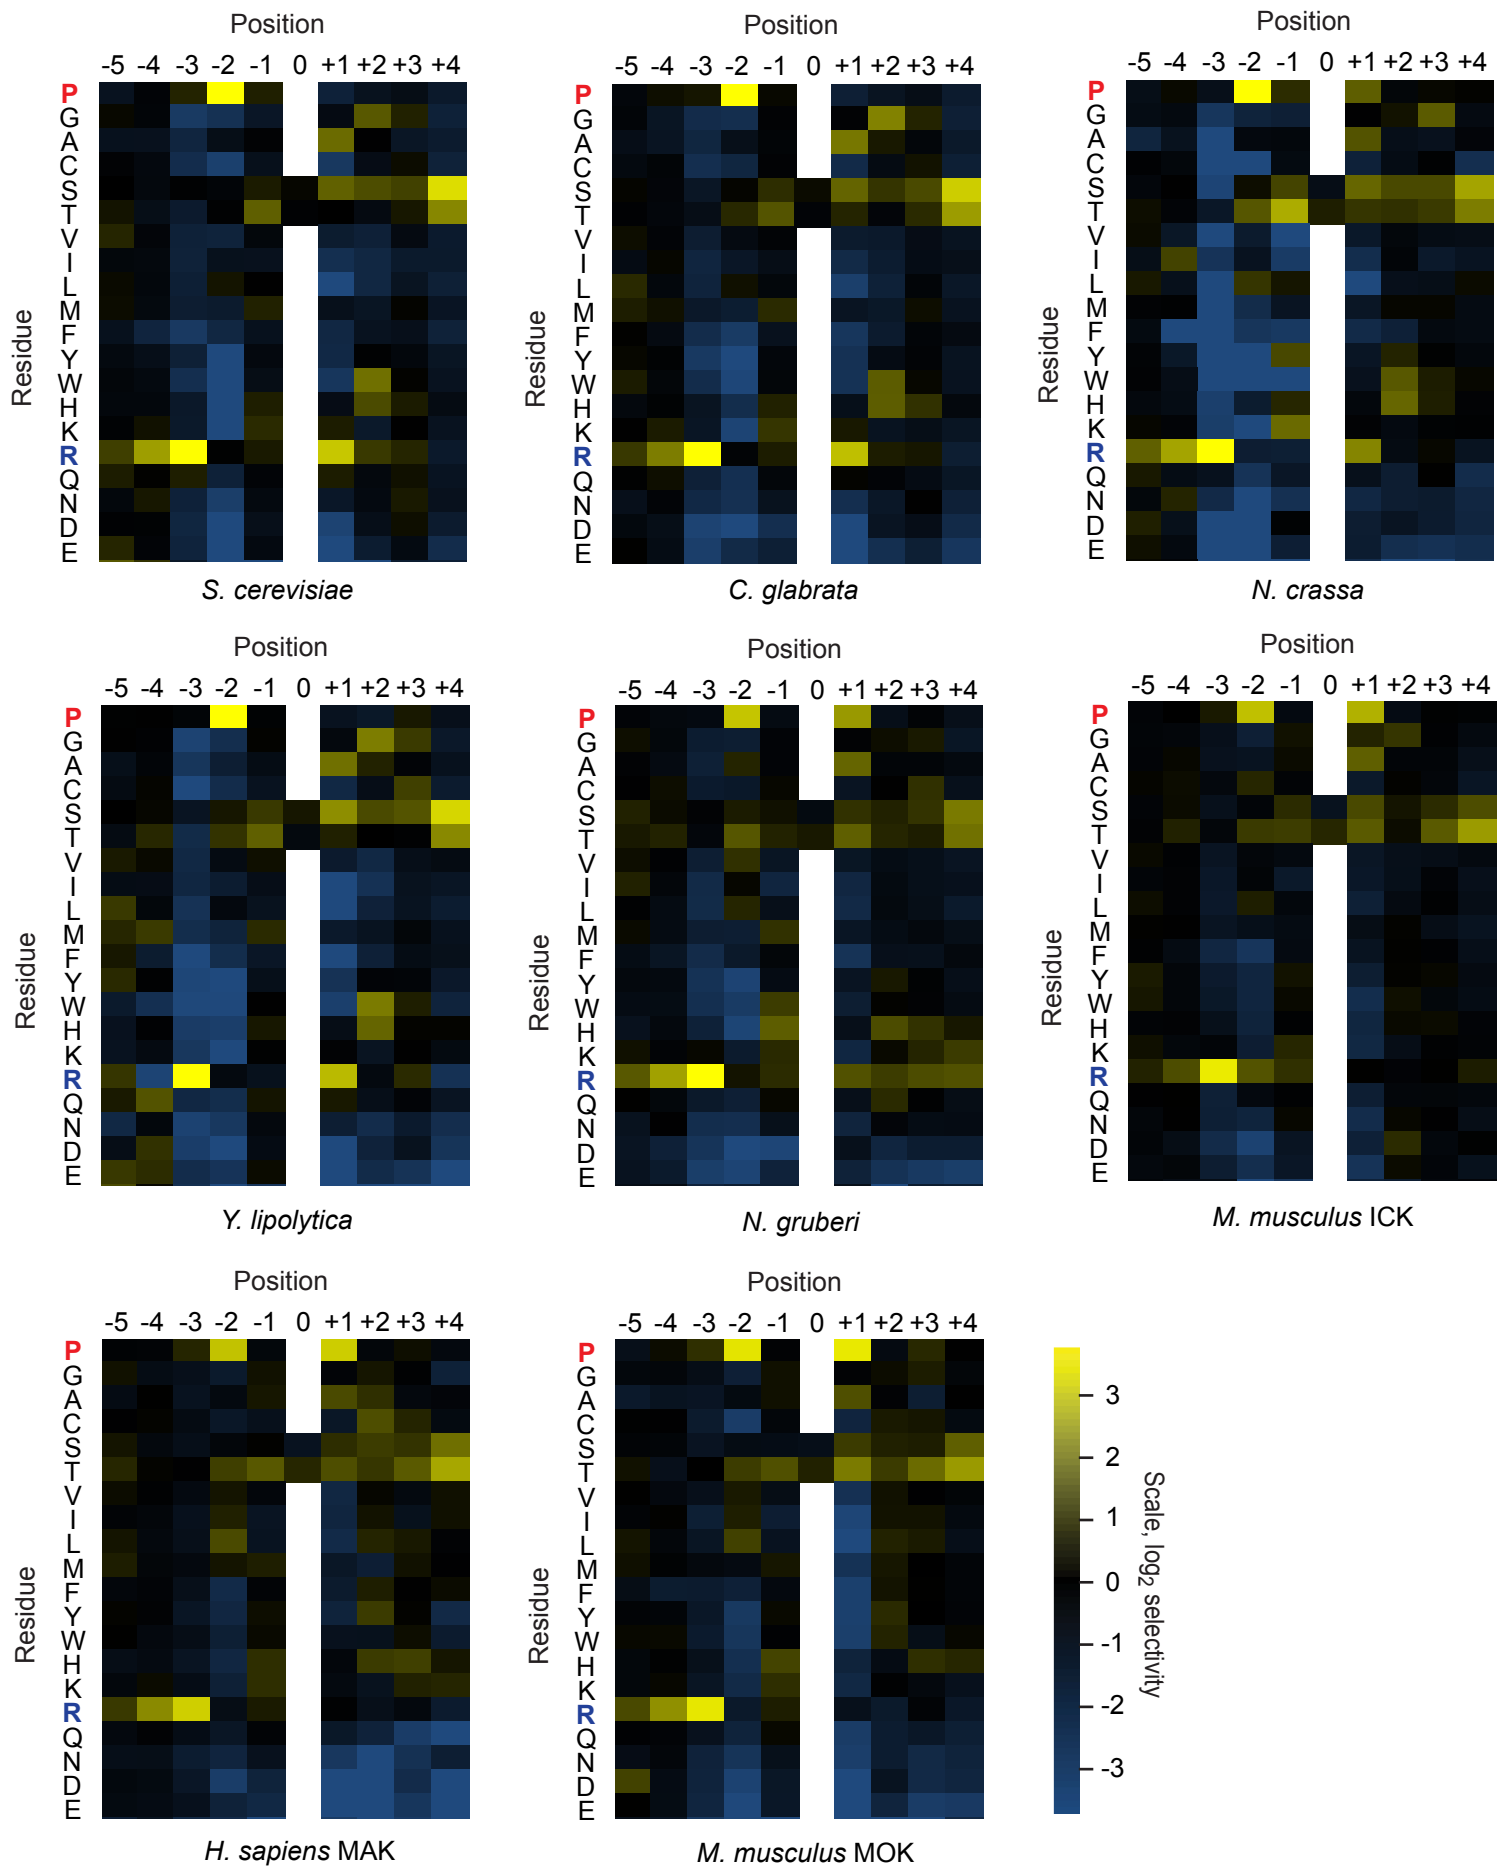

Supplement: supp [file elife-04126-supp-v1.zip]

Figure 4 supplement 2

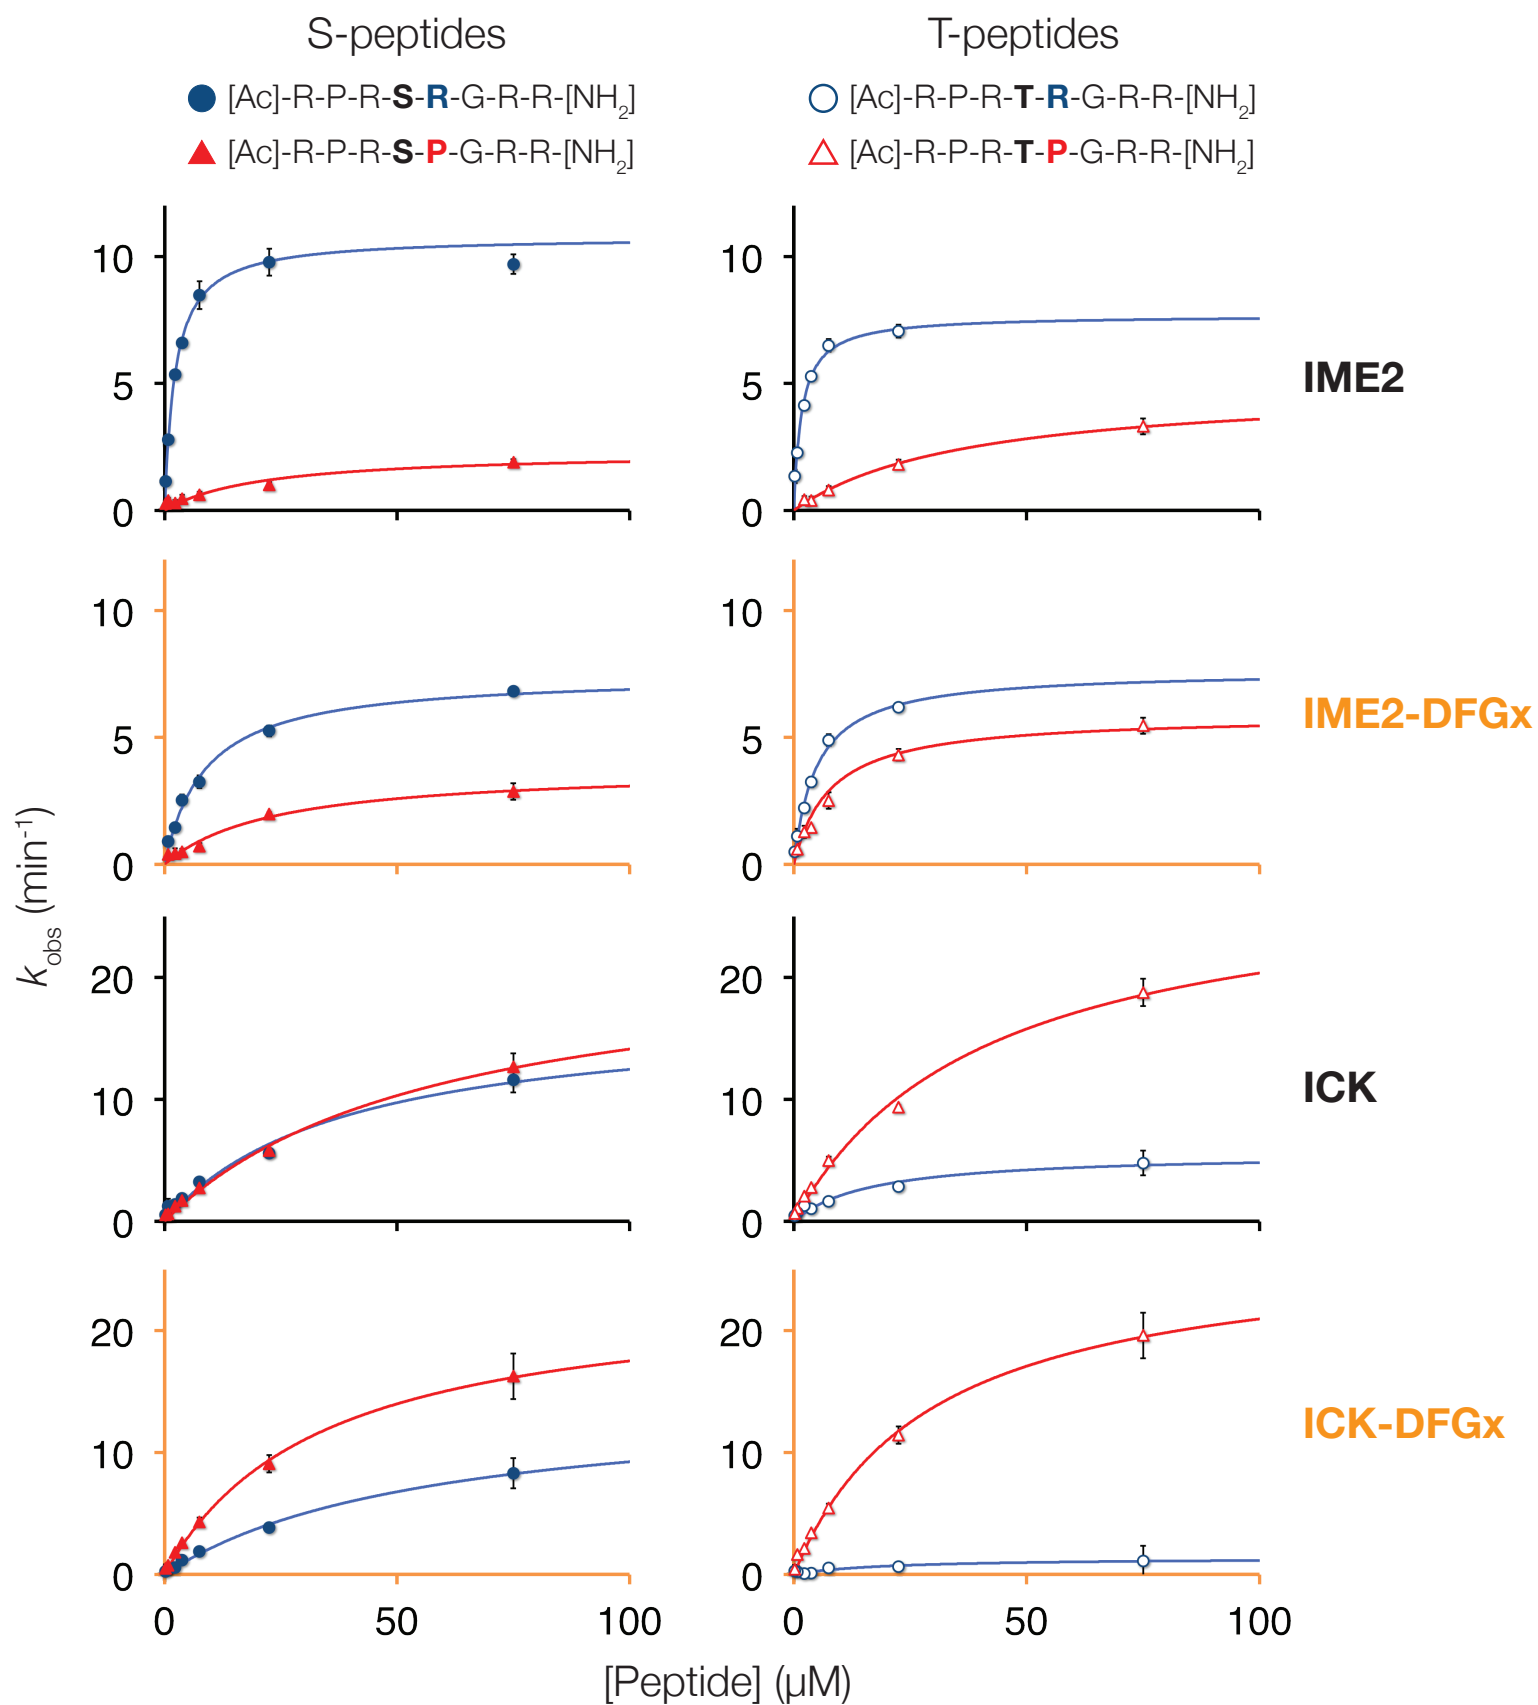

Supplement: supp [file elife-04126-supp-v1.zip]

Figure 1 supplement 1

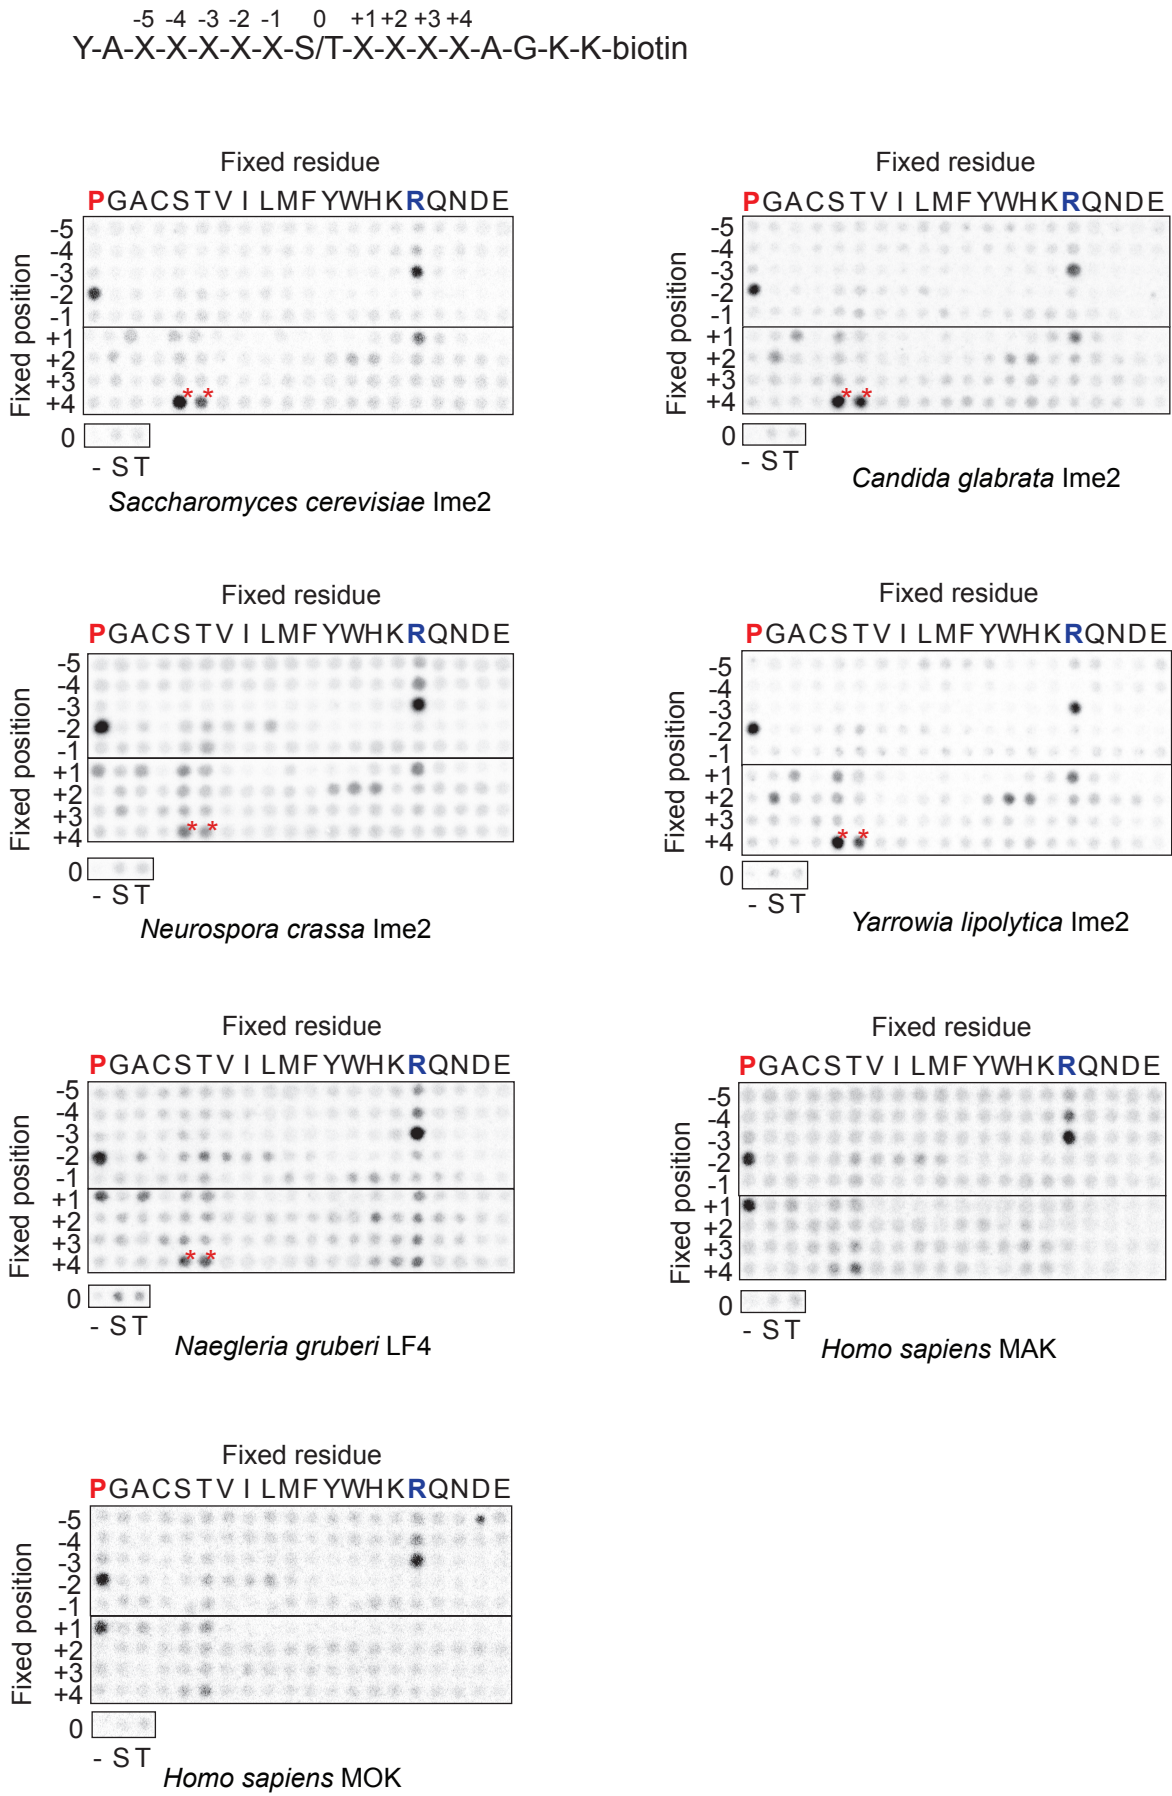

Supplement: supp [file elife-04126-supp-v1.zip]

Figure 3 supplement 1

**A**

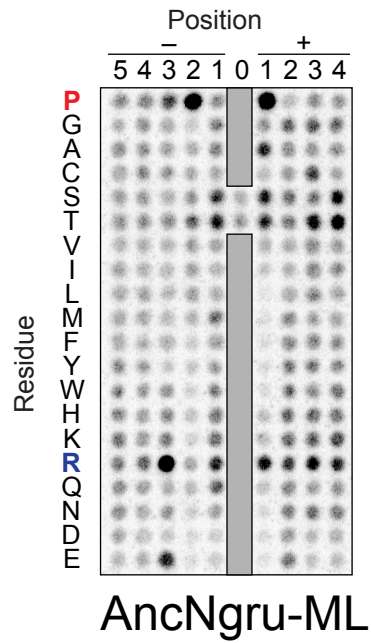

**B**

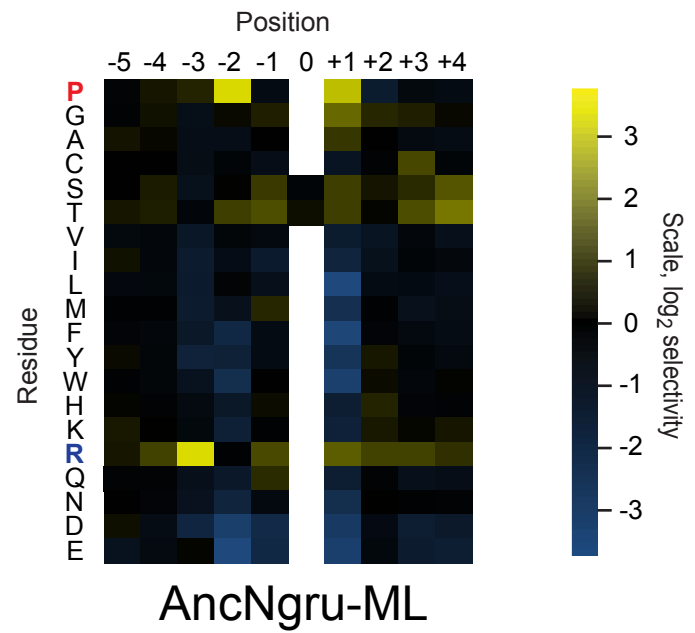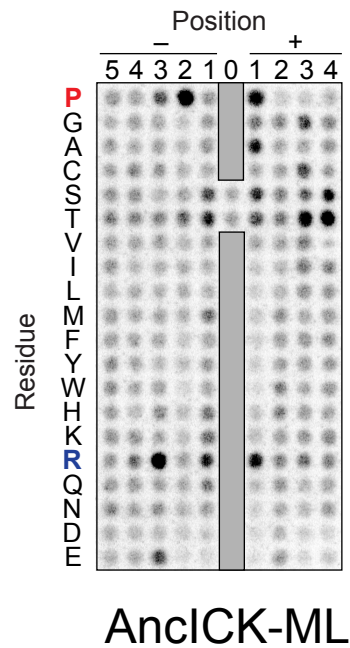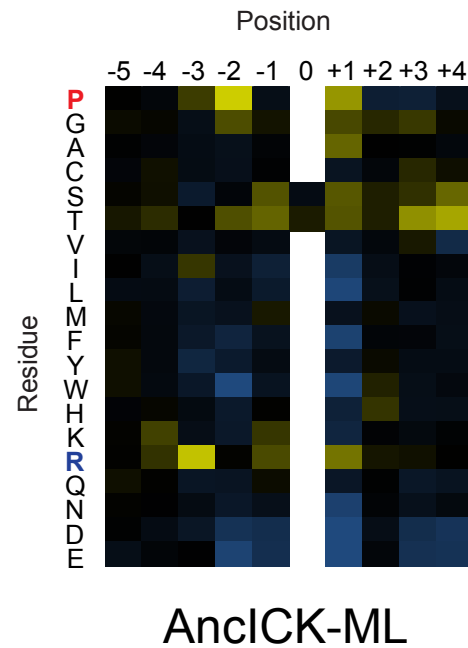

Supplement: supp [file elife-04126-supp-v1.zip]

Figure 5, Supplement 2

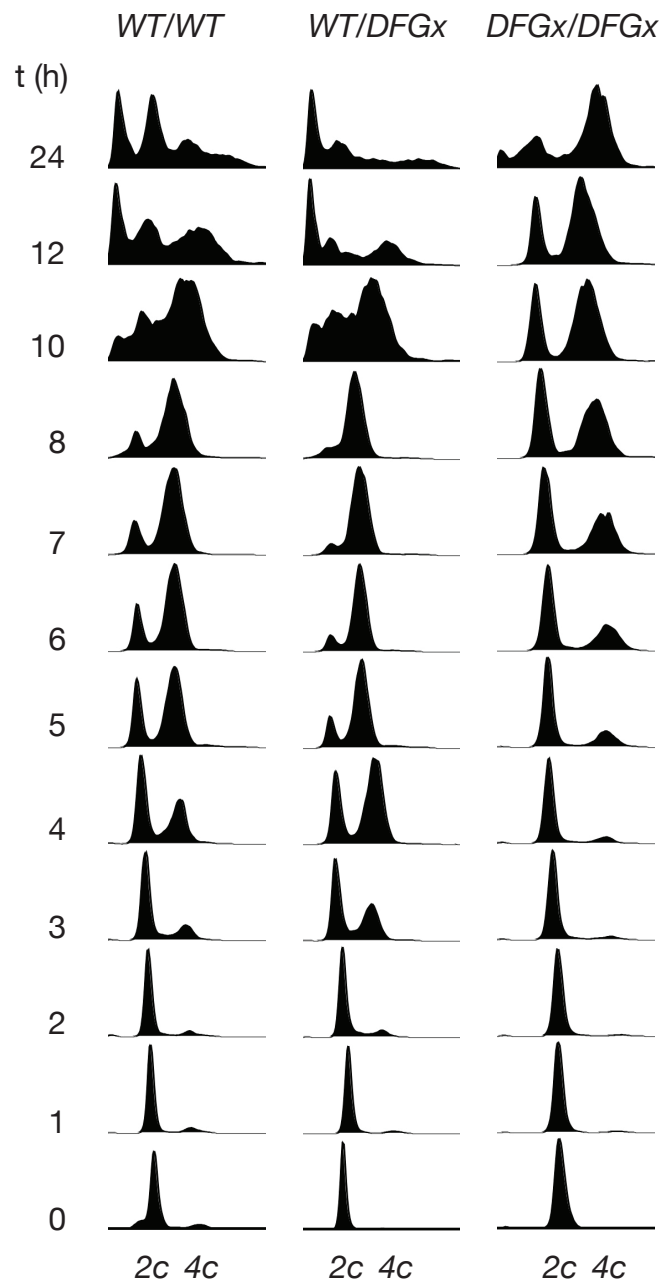

Supplement: supp [file elife-04126-supp-v1.zip]

**A**

AncCMGI

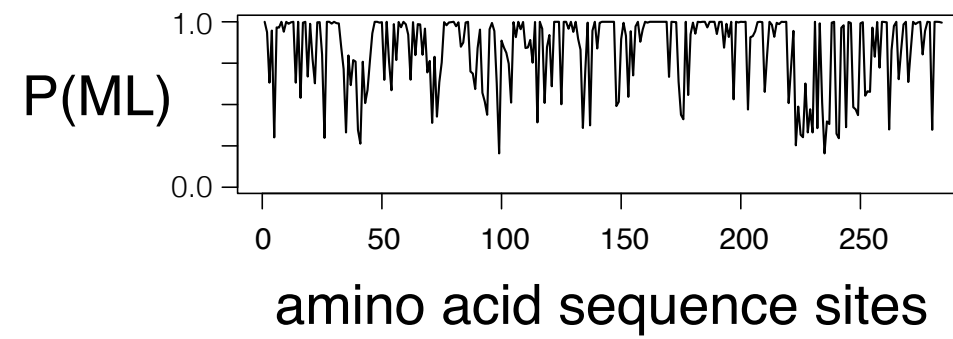

AncNgru

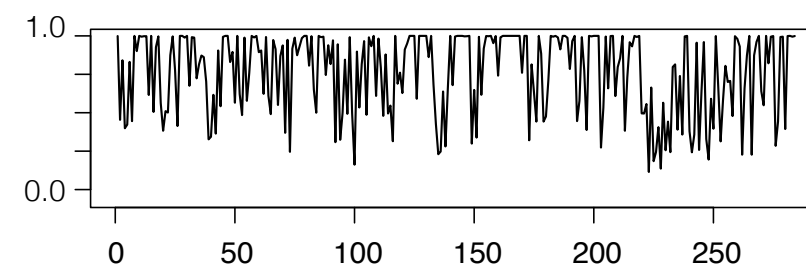

AncICK

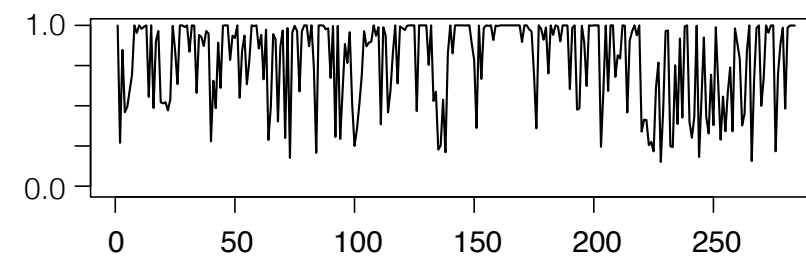

AncCneo

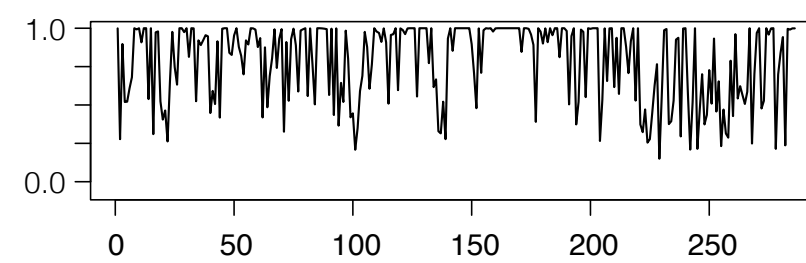

AncNcra

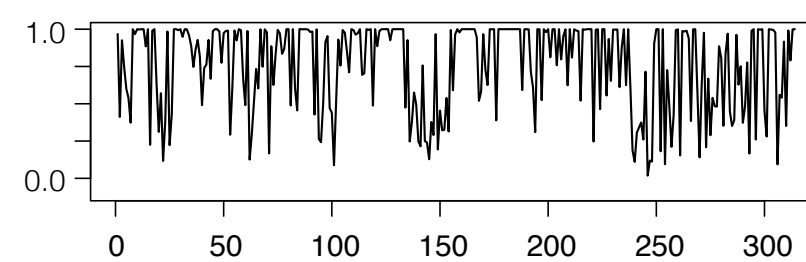

AncYlip

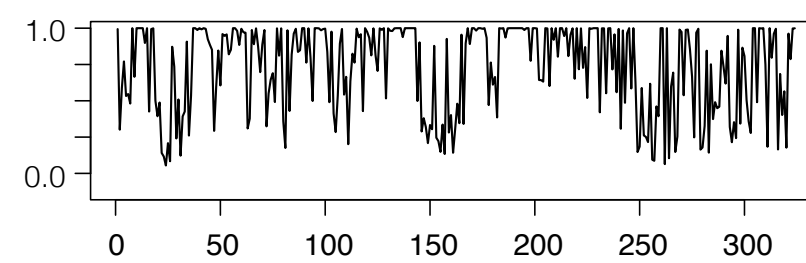

**B**

proportion  
of sites

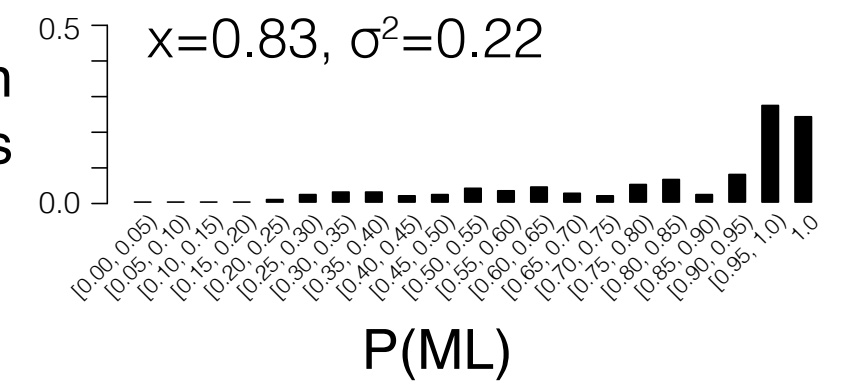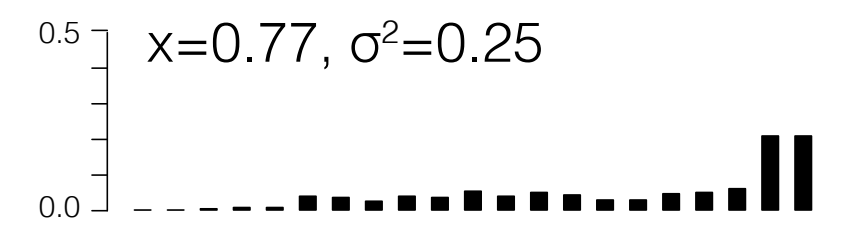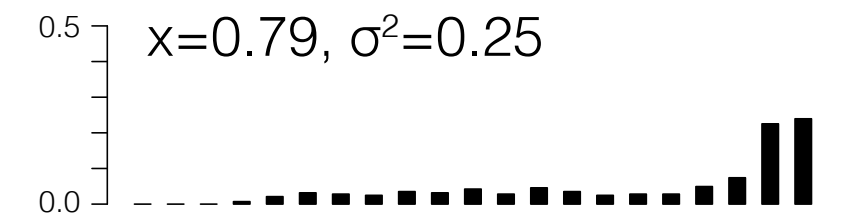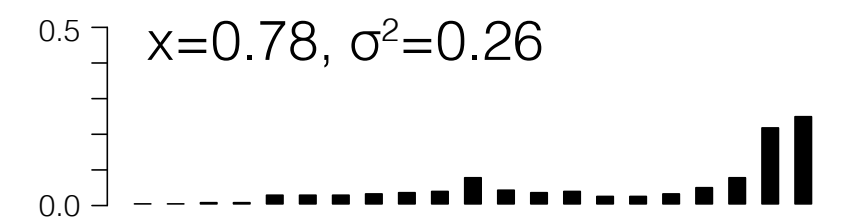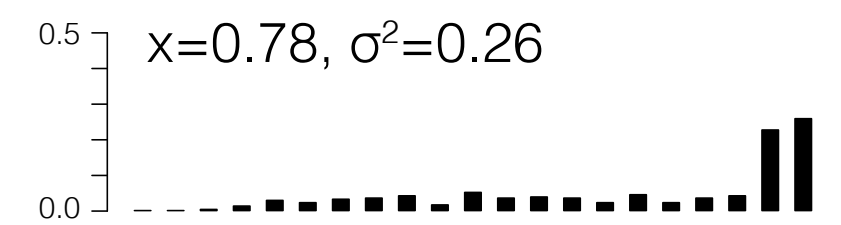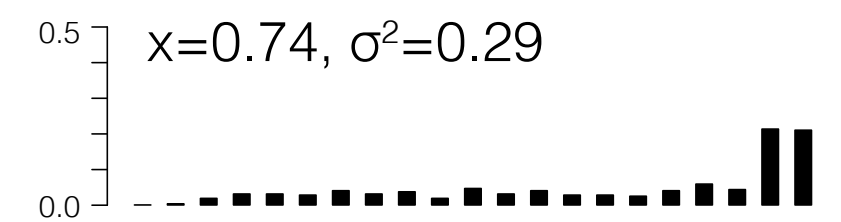

Supplement: supp [file elife-04126-supp-v1.zip]

**A**

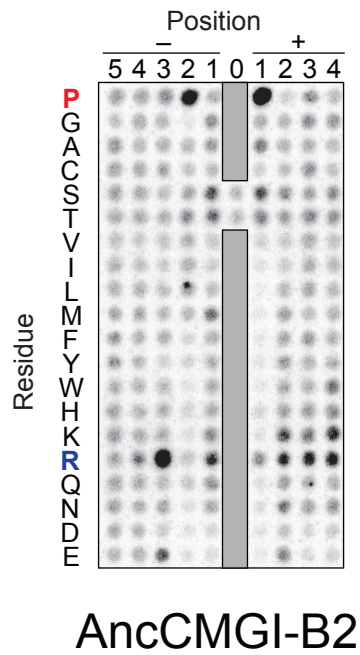

**B**

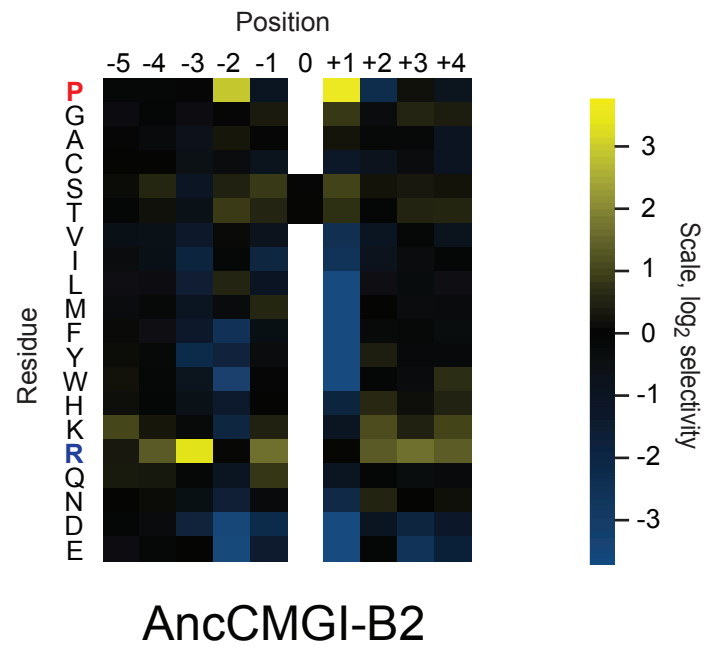

Supplement: supp [file elife-04126-supp-v1.zip]

Figure 4 supplement 4

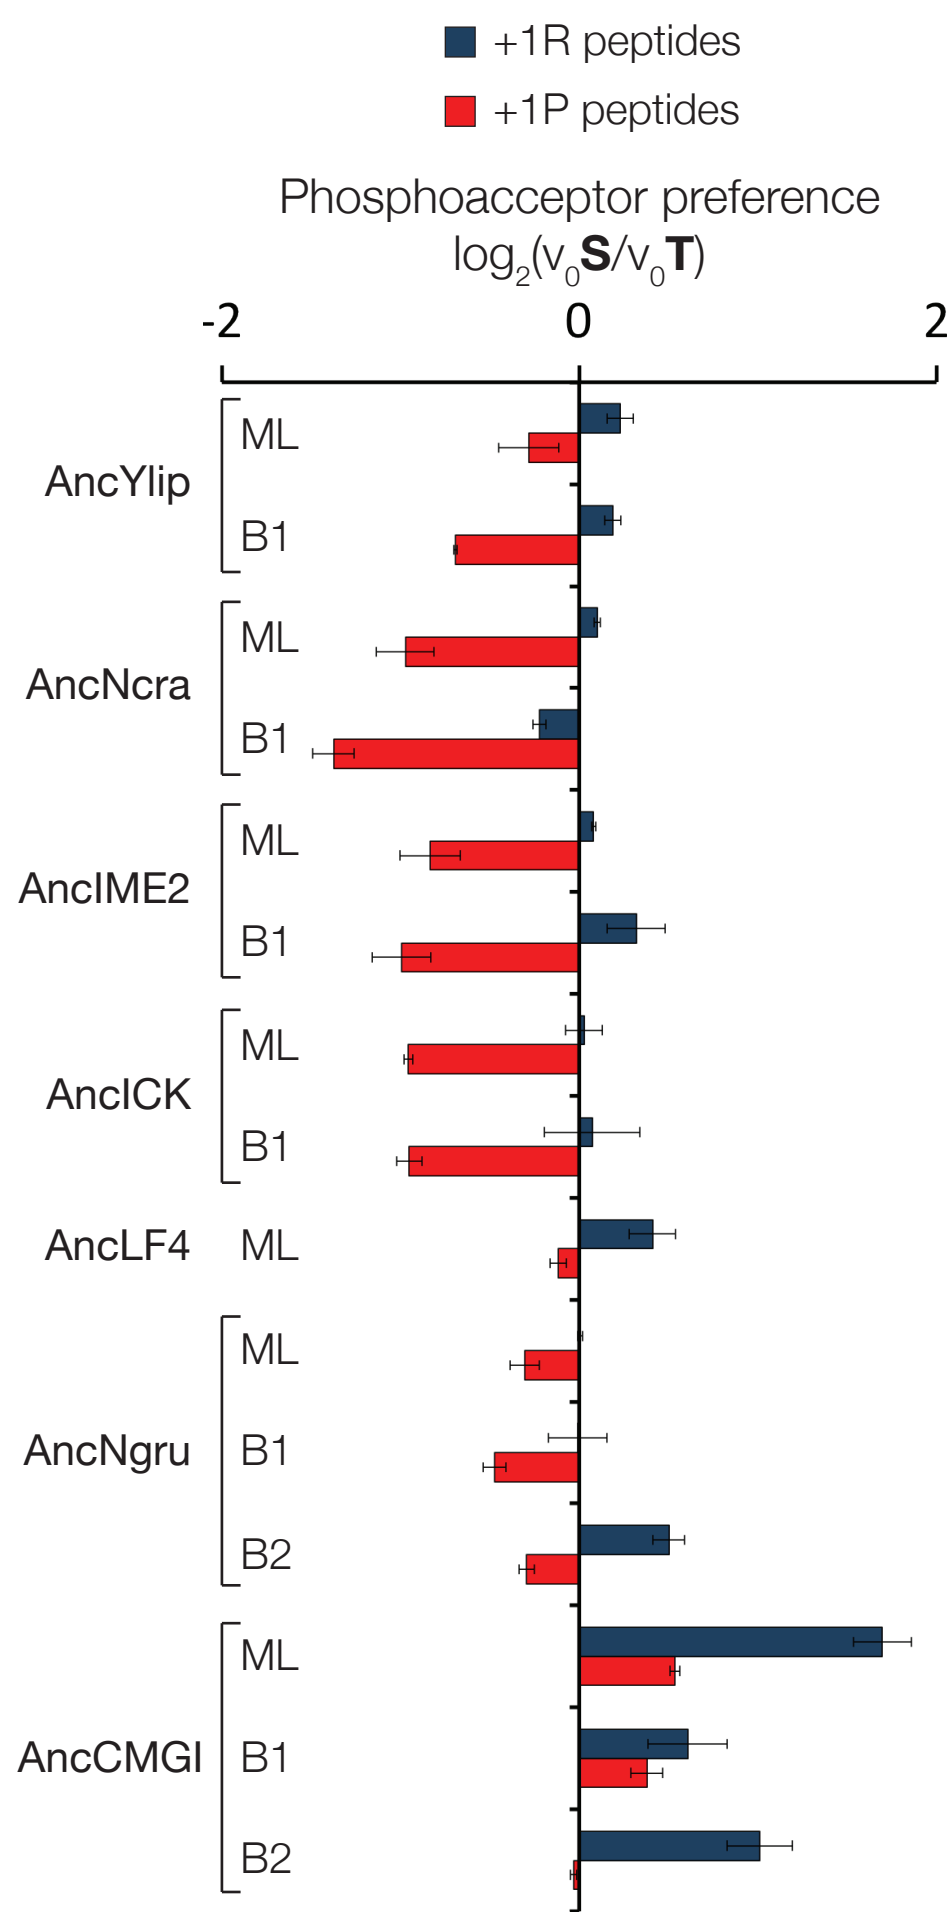

Supplement: supp [file elife-04126-supp-v1.zip]

*Figure 5, Supplement 1*

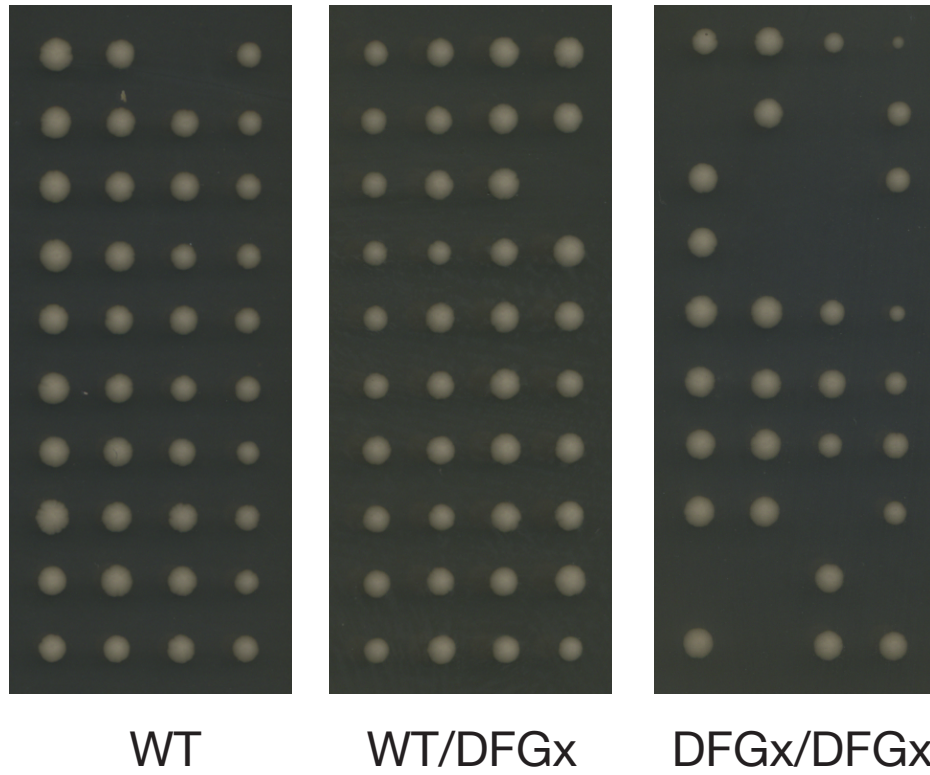

Supplement: supp [file elife-04126-supp-v1.zip]
